# Supplementary material for: An ATR-PrimPol pathway confers tolerance to oncogenic KRAS-induced and heterochromatin-associated replication stress
Source: PubMed Central journal article supplement (PMC10435487; doi:10.1038/s41467-023-40578-2), 2023-08-17
Supplement: 41467_2023_40578_MOESM1_ESM.pdf [file 41467_2023_40578_MOESM1_ESM.pdf]

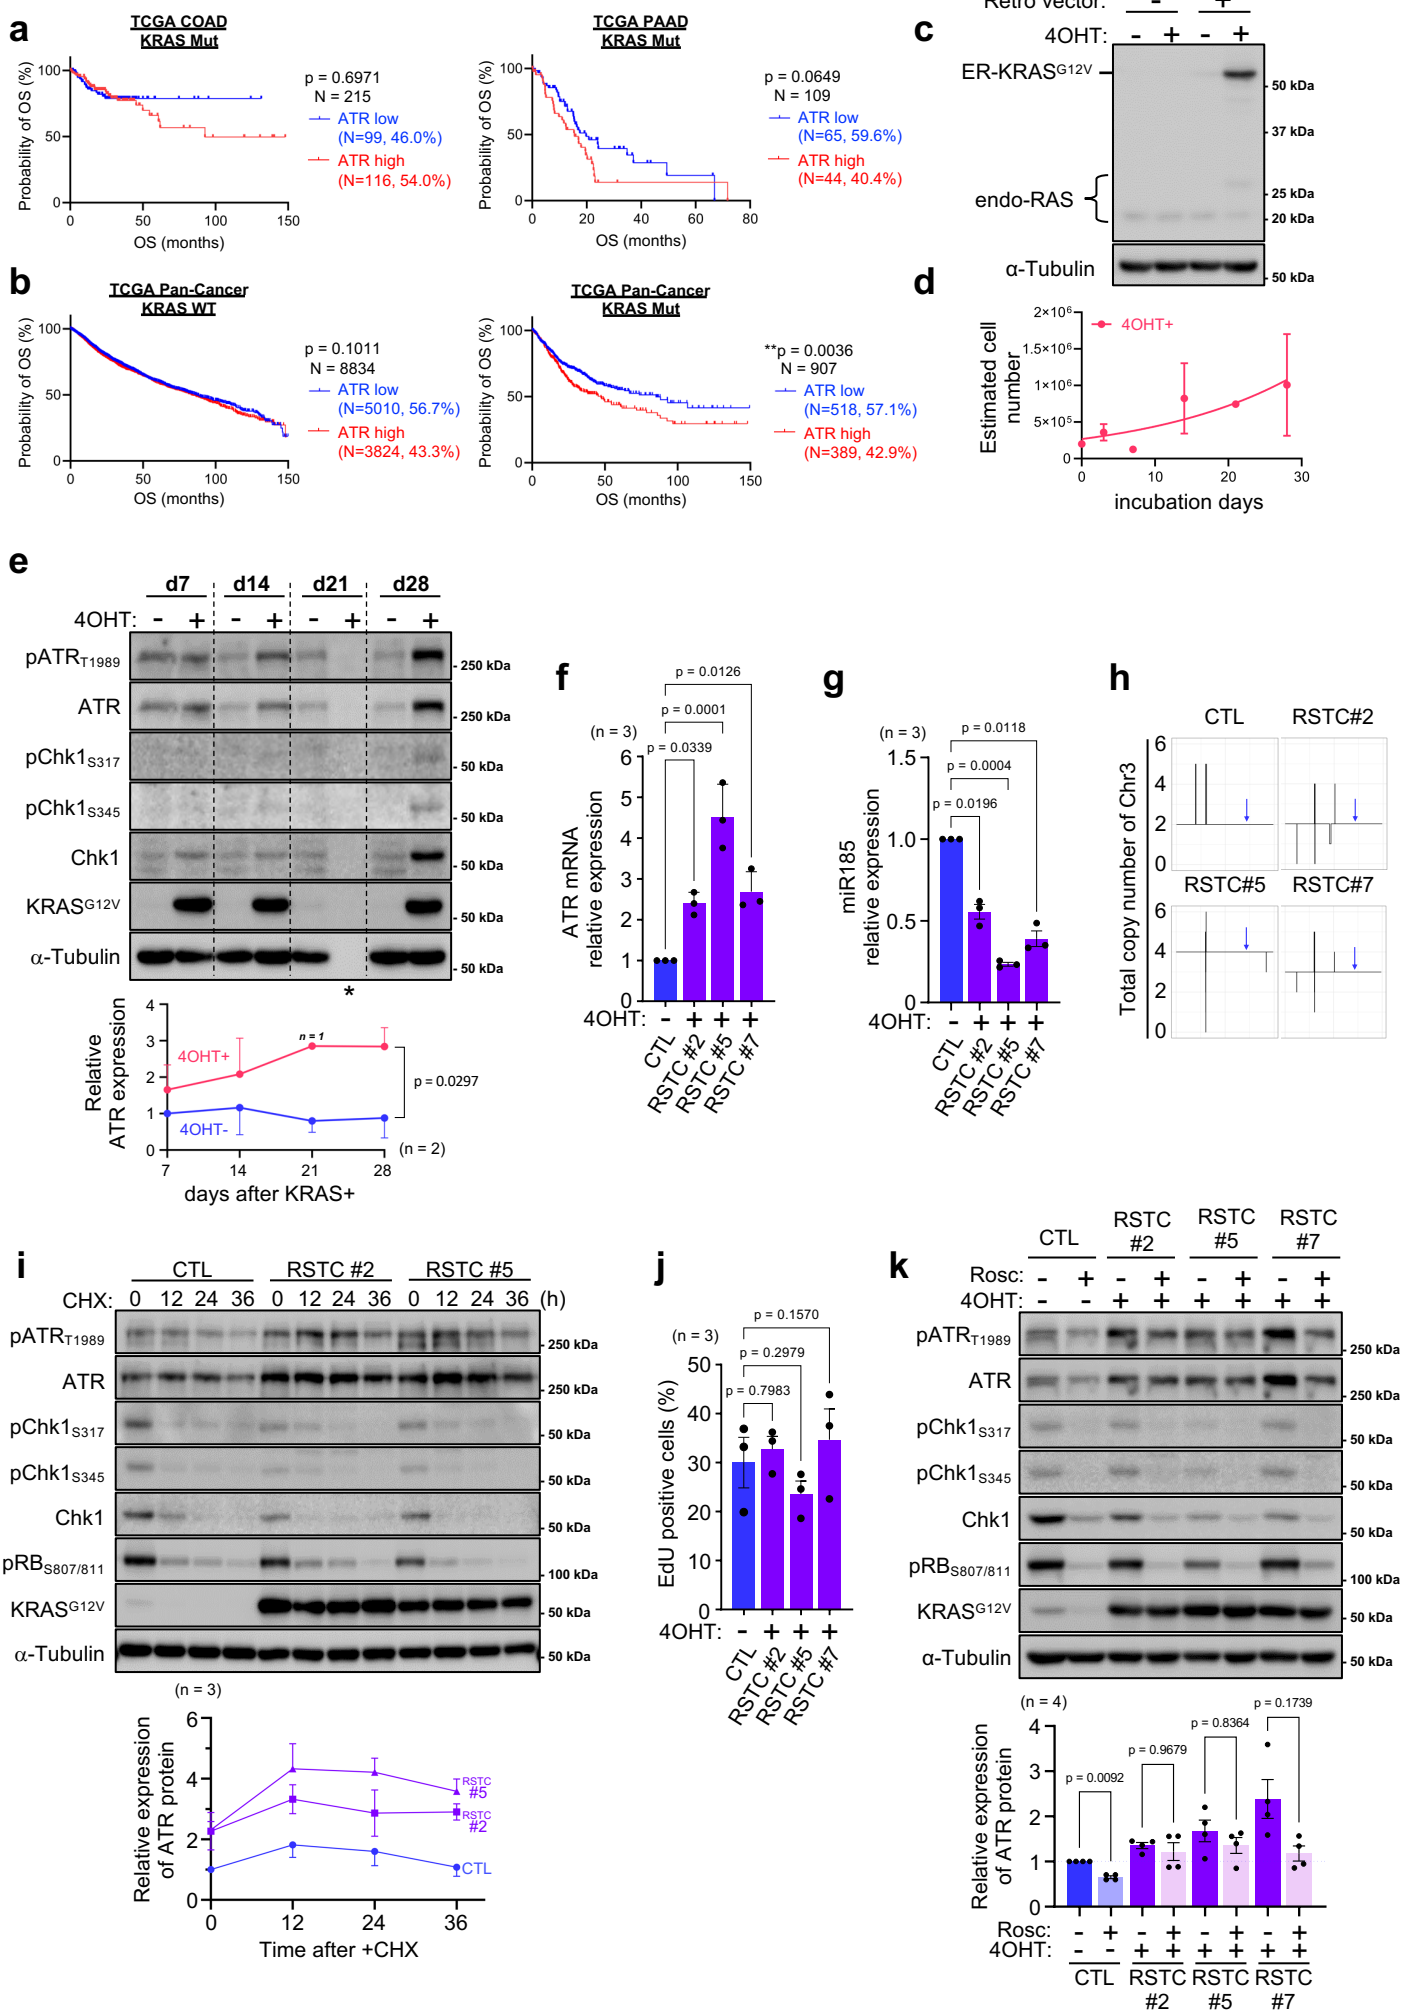

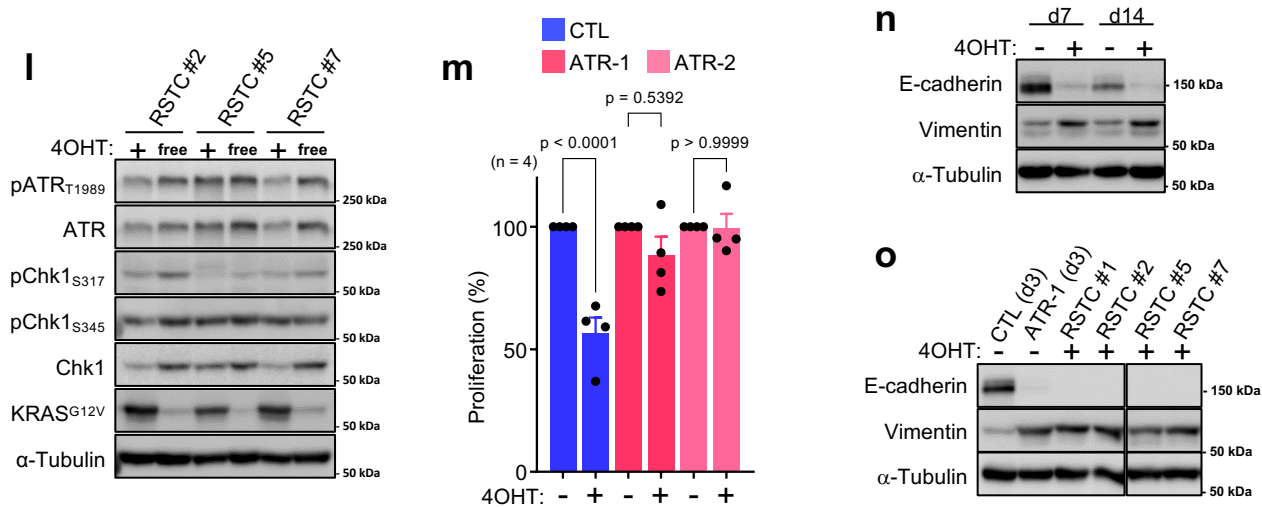

### Supplementary Figure 1.

**a** Overall survival (OS) according to ATR mRNA expression from 215 of colon adenocarcinoma (COAD) and 109 of pancreatic adenocarcinoma (PAAD) patients harboring KRAS<sup>Mut</sup> were analyzed. Log-rank p values are shown. **b** OS according to ATR mRNA expression from 9741 of pan-cancer patients harboring KRAS<sup>WT</sup> and KRAS<sup>Mut</sup> were analyzed. Log-rank p values are shown. **c** Control cells retrovirally transfected with or without estrogen receptor (ER)-KRAS<sup>G12V</sup> were treated with or without 0.1 μM of 4OHT for 3 days. The expression 4OHT-inducible ER-KRAS<sup>G12V</sup>, endogenous pan-RAS and α-Tubulin were analyzed by western blotting. **d** Estimated cell number of Control cells treated with 0.1 μM of 4OHT for 28 days shown in (1d) with a different scale. The results represent the means ± SEM of three independent experiments. **e** Top, biological duplication of (1e). \* The sample of control cells treated with 0.1 μM of 4OHT for 21 days was lost during preparations, Quantification of the relative ATR protein level normalized by each α-Tubulin protein level. The results represent the means ± SEM of (1e & S1e). two-tailed paired parametric t test. **f** The expression level of ATR mRNA in RSTCs #2, #5 and #7 maintained in 0.1 μM of 4OHT-containing medium were analyzed by SYBR Green RT-qPCR. The results represent the means ± SEM of three independent experiments. one-way ANOVA Tukey's test. **g** The expression level of miR185 in RSTCs #2, #5 and #7 maintained in 0.1 μM of 4OHT-containing medium were analyzed by TaqMan RT-qPCR. The results represent the means ± SEM of three independent experiments. one-way ANOVA Tukey's test. **h** Total copy number of ATR-encoded Chr3. Copy number gain of Chr3 was observed in RSTC#5 and #7. Blue arrow indicates ATR-encoded position. **i** Top, representative result of Cycloheximide (CHX) treatment assay of RSTCs #2, #5 cultured in 0.1 μM of 4OHT-containing medium. Cells were treated with 300 μg/ml of CHX for indicated times. The expression level of indicated proteins were analyzed by western blotting. Bottom, quantification of the relative ATR protein level normalized by each α-Tubulin protein level. The results represent the means ± SEM of three independent experiments. **j** Quantification of EdU positive cells in RSTCs #2, #5 and #7 maintained in 0.1 μM of 4OHT-containing medium were analyzed by EdU-Click iT assay. The results represent the means ± SEM of three independent experiments. one-way ANOVA Tukey's test. **k** top, representative result of Roscovitine (Rosco) treatment assay in Control, RSTCs #2, #5 and #7. Cells were treated with 25 μM of Rosco for 24 h. Bottom, quantification of the relative ATR protein level normalized by each α-Tubulin protein level. The results represent the means ± SEM of four independent experiments. one-way ANOVA Tukey's test. **l** Representative result of 4OHT free assay in RSTCs #2, #5 and #7. RSTC clones were split into with or without 0.1 μM of 4OHT conditions and cultured for 31 days. The expression level of indicated proteins were analyzed by western blotting. **m** Quantification of cell proliferation of the cells. Cell growth was determined using PrestoBlue after 0.1 μM of 4OHT treatment for 7 days. The results represent the means ± SEM of four independent experiments. one-way ANOVA Tukey's test. **n** The indicated proteins expression level in Control cells maintained with or without 0.1 μM of 4OHT-containing medium for ~14 days were analyzed by western blotting. Representative result of two independent reproducible experiments are shown. **o** The indicated proteins expression level in RSTC clones #2, #5 and #7 maintained in 0.1 μM of 4OHT-containing medium were analyzed by western blotting. Control and ATR-1 cells incubated for 3 days were shown as control. Representative result of three independent reproducible experiments are shown. All source data are provided as a Source Data file.

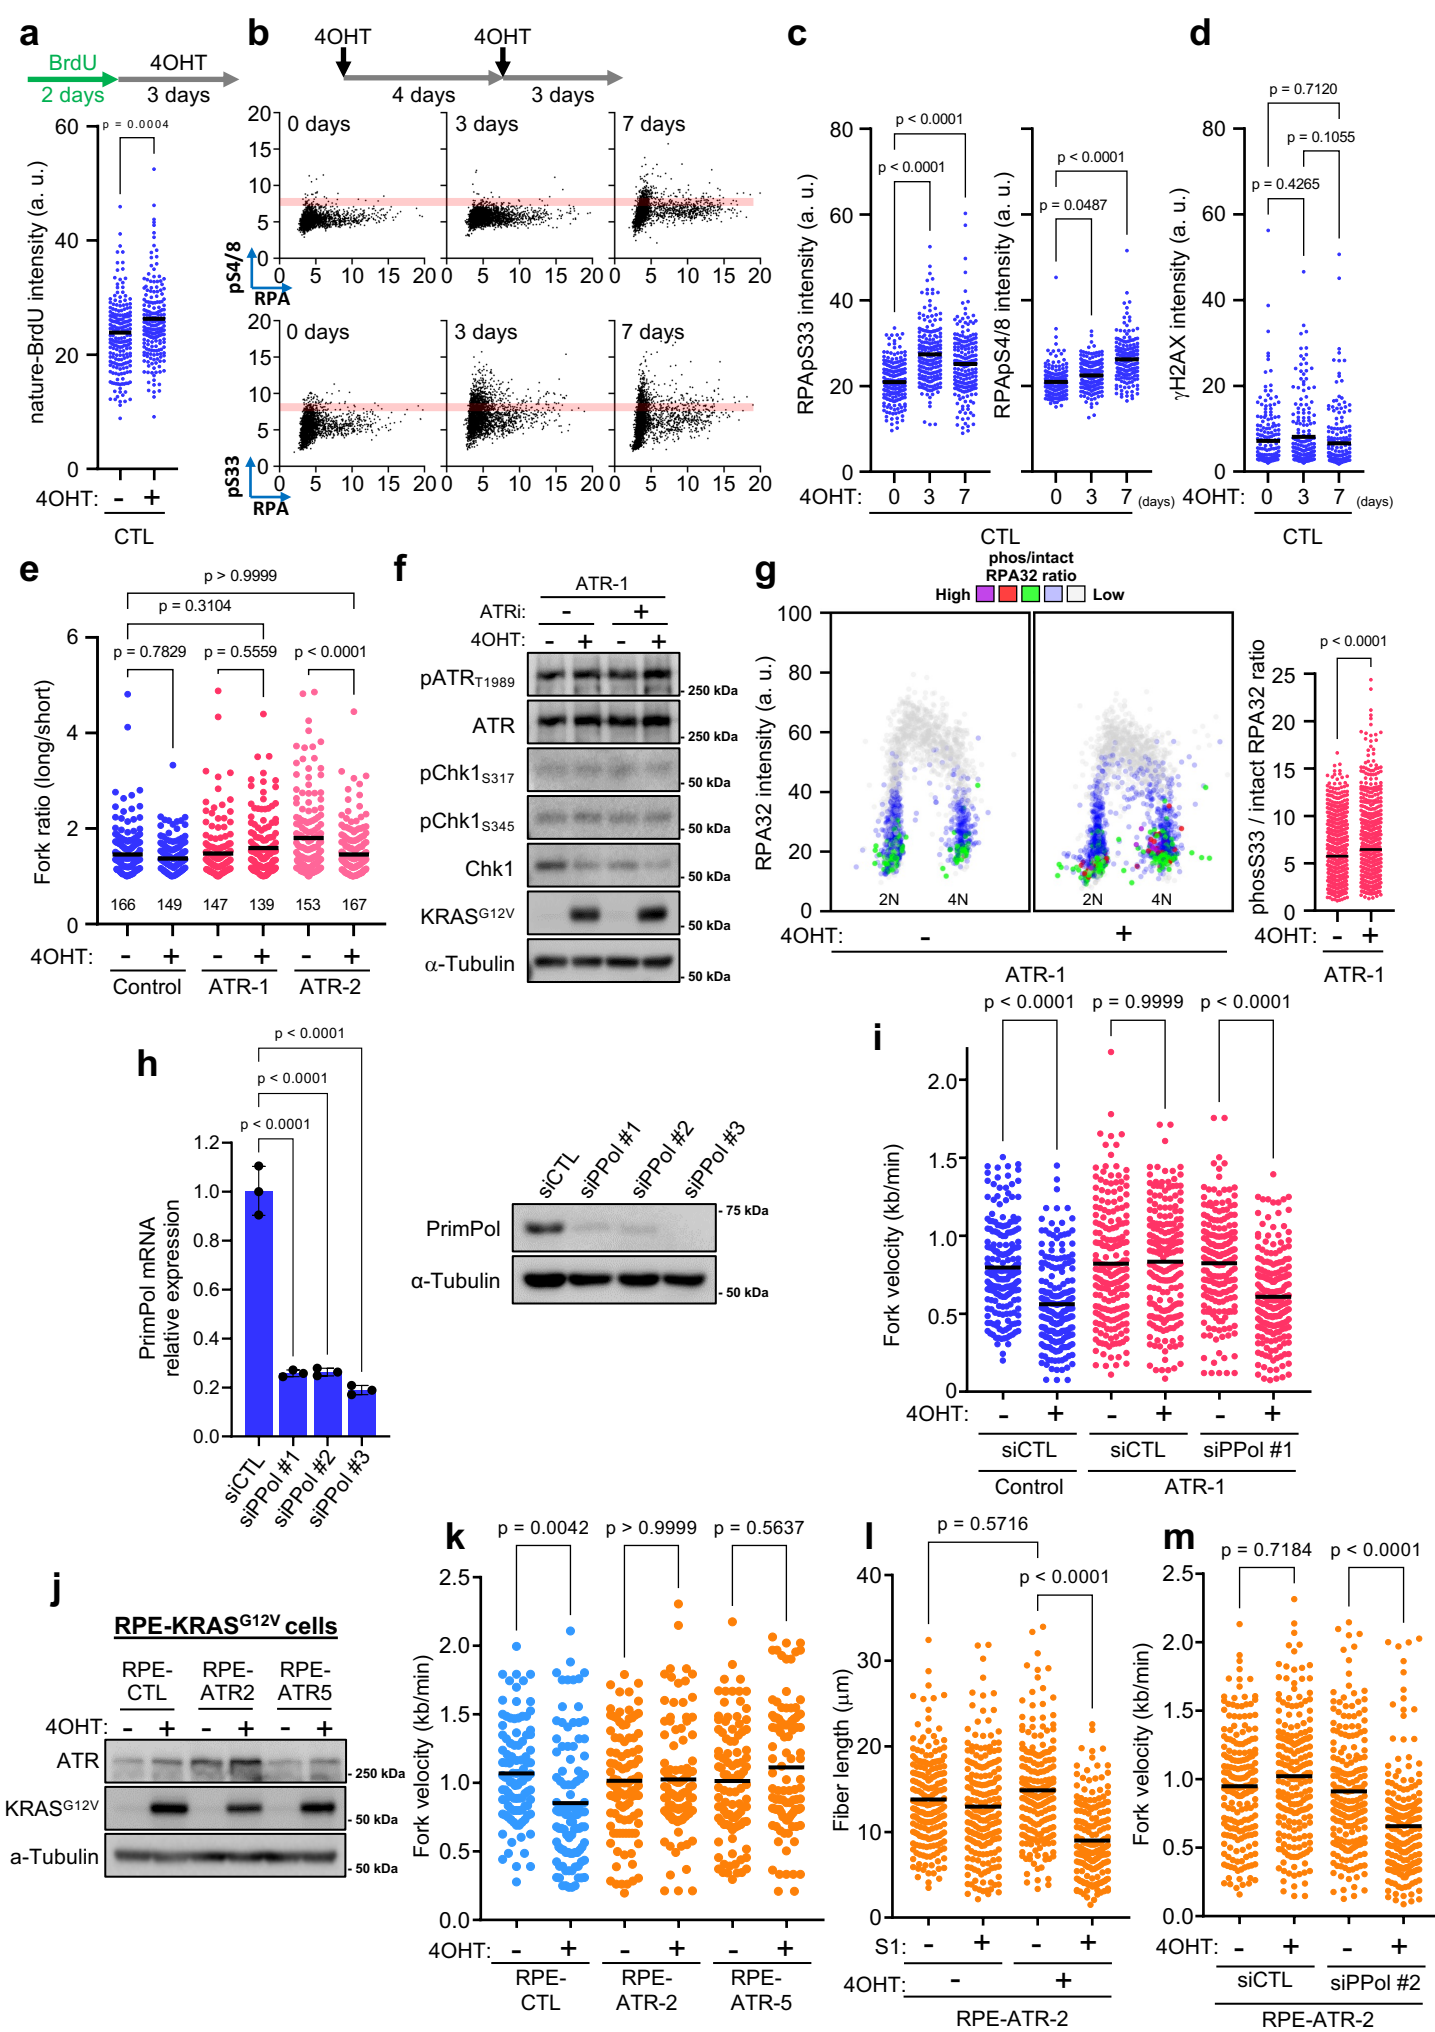

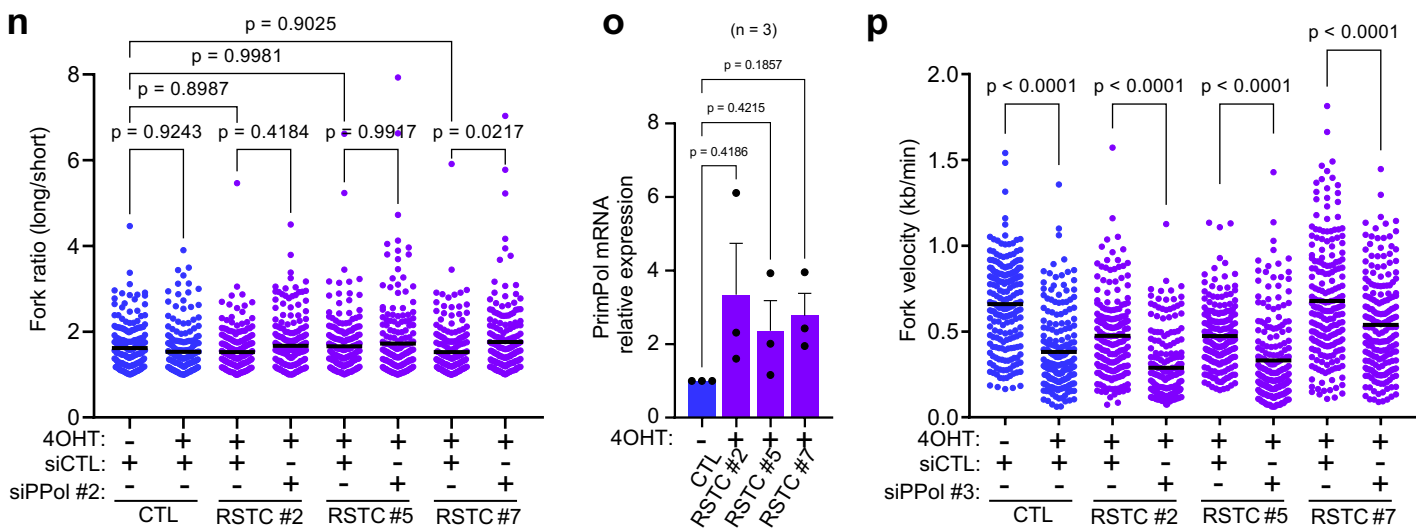

## Supplementary Figure 2.

**a** Native-BrdU detection assay. Cells were grown in 10  $\mu$ M of BrdU-containing medium and incubated for 2 days before released into BrdU-free medium with or without 0.1  $\mu$ M of 4OHT for 3 days. Representative result of two independent reproducible experiments. Black lines indicate the mean; arbitrary units, a. u.;  $n = 200$ ; two-tailed Mann-Whitney t test. **b, c** Cells were treated with 0.1  $\mu$ M of 4OHT for 3 or 7 days respectively, then followed by immunofluorescence. Representative result of three independent reproducible experiments are shown. **b** Scatterplot shows the mean of intact RPA32 intensity (x axis) versus mean of phospho-RPA32 (Ser4/8 or Ser33) intensity (y axis). 3,000 cells are shown. **c** Quantification of the phospho-RPA32 (Ser4/8 or Ser33) intensity shown in (S2b). arbitrary units, a. u. **d** Quantification of the  $\gamma$ H2AX intensity after 4OHT treatment for 3 or 7 days, respectively. Representative result of two independent reproducible experiments. arbitrary units, a. u. **e** Dot plot and mean of fork ratio in Control, ATR-1 and ATR-2 cells treated with 0.1  $\mu$ M of 4OHT for 3 days shown in (2b). **f** Representative western blotting result of ATR-1 cells treated with 0.1  $\mu$ M of 4OHT for 3 days shown in (2c). Low dose of ATRi (1 nM) was added 24 h prior to sampling. **g** Left, quantitative image-based cytometry (QIBC) of chromatin-bound phospho-RPA32 (Ser33) and intact-RPA32 visualized by pre-extraction method in ATR-1 cells after 0.1  $\mu$ M of 4OHT treatment for 3 days. The color of 3,000 cells indicates phospho-RPA32 (Ser33) intensity normalized by its intact-RPA32 intensity. Right, quantification of normalized phospho-RPA32 (Ser33) intensity. Representative result of two independent reproducible experiments are shown. Black lines indicate the mean;  $n = 1000$ ; two-tailed Mann-Whitney t test. **h** Control SAECs were transfected with 1 nM of three independent siRNAs of PrimPol for 24 h. The expression level of PrimPol were analyzed by SYBR Green RT-qPCR and western blotting. Data are presented as mean  $\pm$  SD ( $n=3$ ). one-way ANOVA Tukey's test. **i** Dot plot and mean of fork speed in Control SAECs and ATR-1 cells transfected with 1 nM of siControl or siPPol #1 for 24 h and treated with 0.1  $\mu$ M of 4OHT for 3 days. Representative result of three independent reproducible experiments are shown. **j-m** RPE-derived Control, ATR-2 and ATR-5 cells were treated with or without 0.1  $\mu$ M of 4OHT for 3 days. **j** The indicated proteins expression levels were analyzed by western blot analysis. **k** Dot plot and mean of fork speed. Representative result of three independent reproducible experiments are shown. Black lines indicate the mean;  $n = 100$ ; one-way ANOVA Tukey's test. **l** Dot plot and mean of fiber lengths with or without 10 U/ml of S1 nuclease treatment for 30 min. Representative result of two independent reproducible experiments are shown. **m** Dot plot and mean of fork speed with 1 nM of siControl or siPPol #2 transfection for 24 h and 0.1  $\mu$ M of 4OHT treatment for 3 days. Representative result of three independent reproducible experiments are shown. **n** Dot plot and mean of fork ratio in SAEC-parental cells, RSTCs #2, #5 and #7 transfected with 1 nM of siControl or siPPol #2 for 24 h and treated with 0.1  $\mu$ M of 4OHT for 3 days as shown in (2g). **o** The mRNA expression level of PrimPol in RSTCs #2, #5 and #7 maintained in 0.1  $\mu$ M of 4OHT-containing medium were analyzed by SYBR Green RT-qPCR. The results represent the means  $\pm$  SEM of three independent experiments. one-way ANOVA Tukey's test. **p** Dot plot and mean of fork speed in control cells and RSTCs #2, #5 and #7 transfected with 1 nM of siControl or siPPol #3 for 24 h and treated with 0.1  $\mu$ M of 4OHT for 3 days. Representative result of two independent reproducible experiments are shown. **c, d, e, i, l-n, p** Black lines indicate the mean;  $n = 200$ ; one-way ANOVA Tukey's test. All source data are provided as a Source Data file.

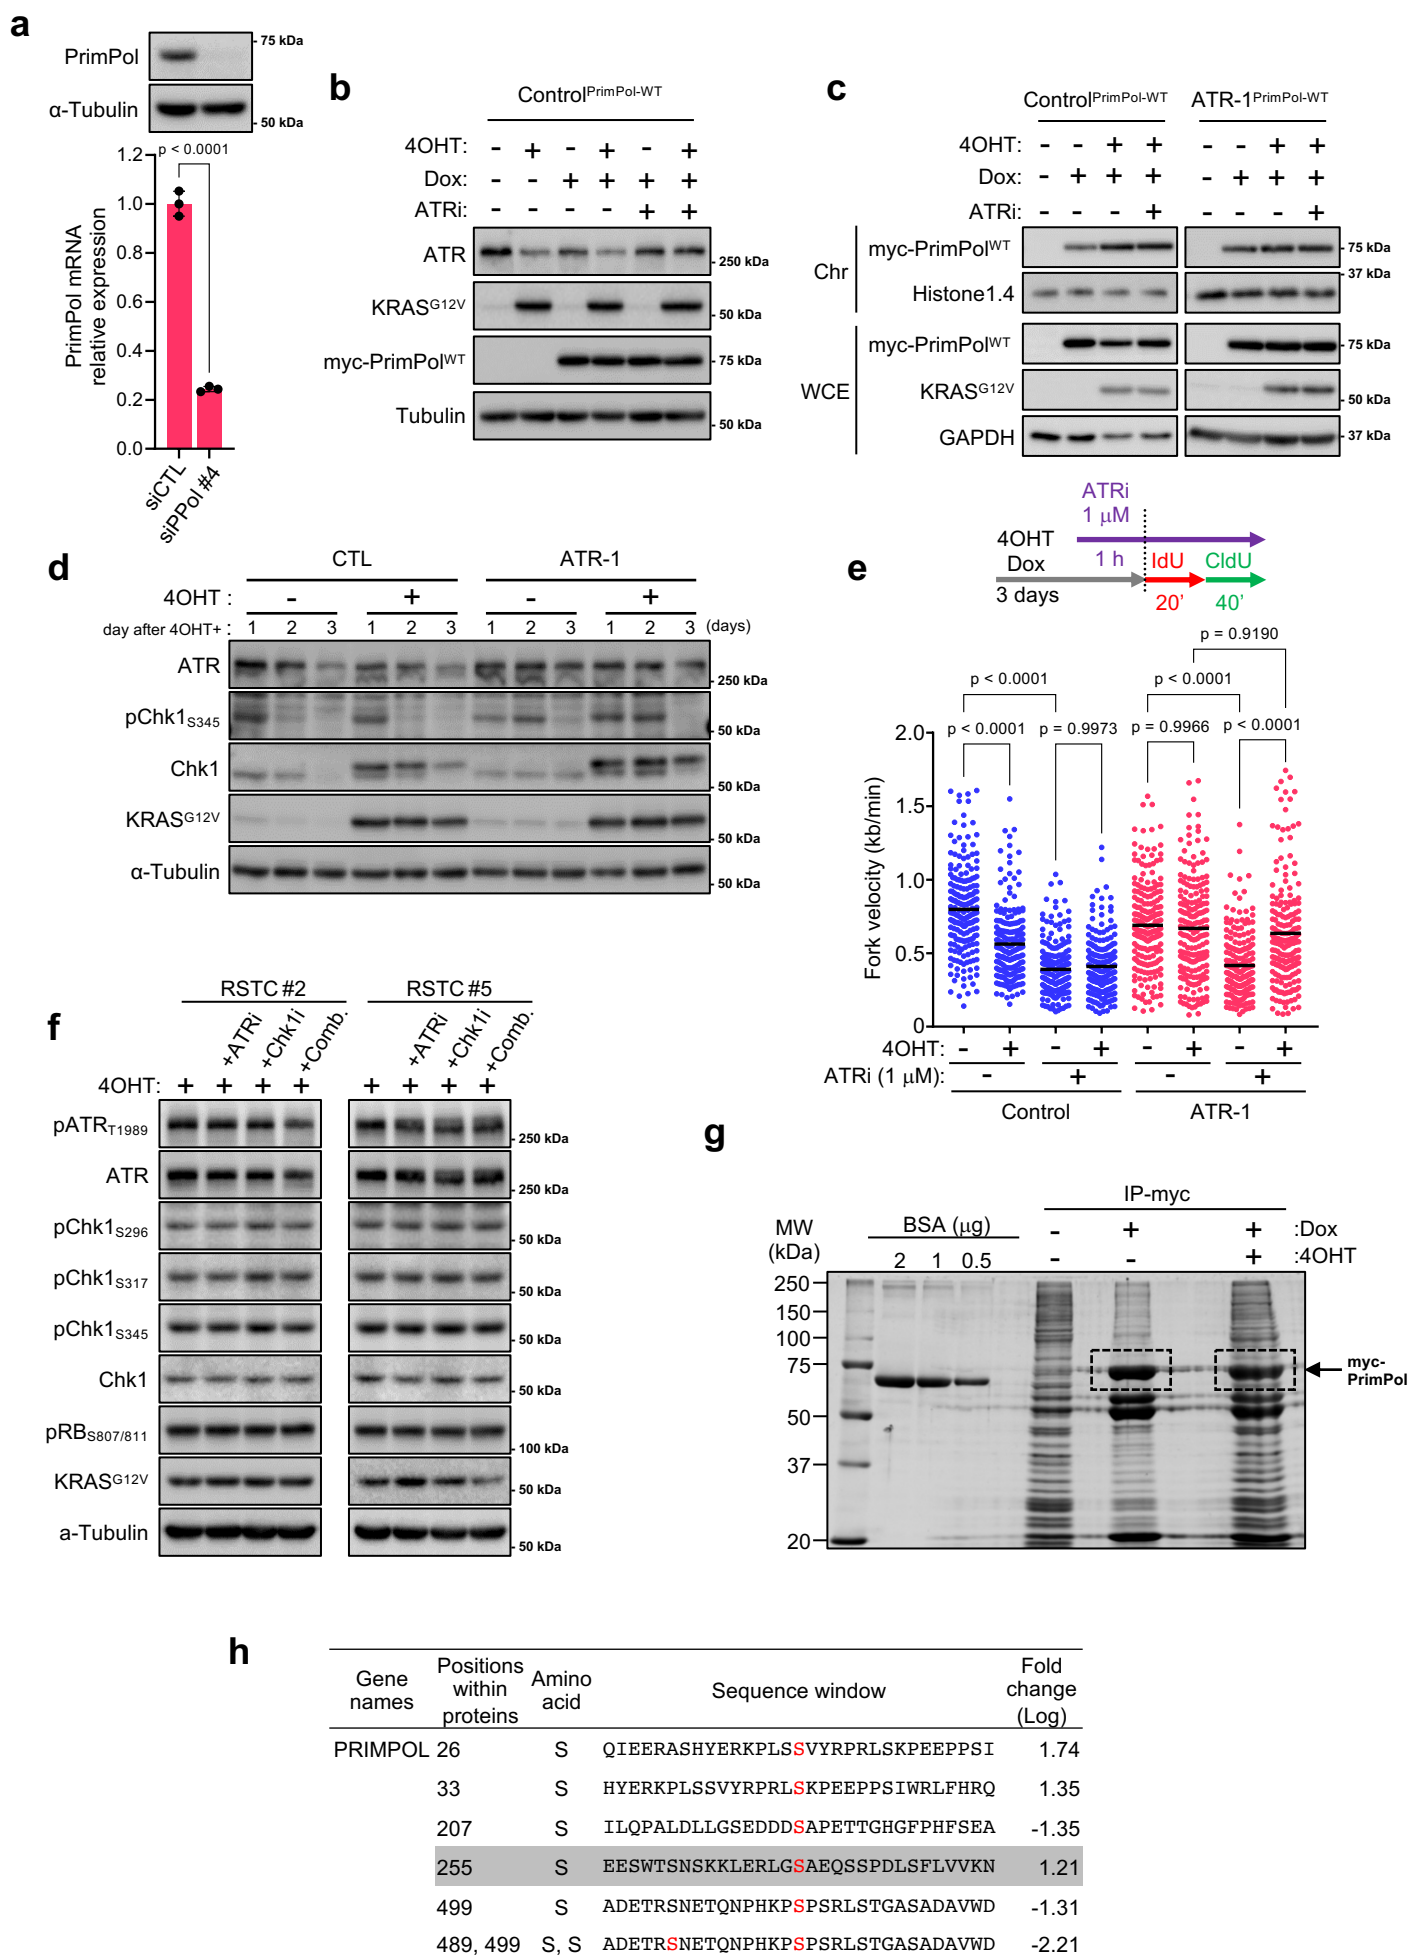

Igarashi et al. Supplementary Figure 3

### Supplementary Figure 3.

**a** ATR-1 cells were transfected with 5 nM of siUTR-PrimPol (siPPol #4) for 24 h. The mRNA expression level of PrimPol were analyzed by RT-qPCR. Data are presented as mean  $\pm$  SD (n=3). two-tailed unpaired t test. **b** The indicated proteins expression level in Control cells harboring doxycycline-inducible myc-PrimPol<sup>WT</sup> treated with 0.1  $\mu$ M of 4OHT and with or without 1  $\mu$ g/ml of doxycycline for 3 days were analyzed by western blotting. 1 nM of ATRi was added 24 h prior to sampling. Representative result of two independent reproducible experiments are shown. **c** Representative result of two independent reproducible chromatin fractionation assay. Control and ATR-1 cells harboring doxycycline-inducible myc-PrimPol<sup>WT</sup> treated with 0.1  $\mu$ M of 4OHT and with or without 1  $\mu$ g/ml of doxycycline for 3 days. 1 nM of ATRi was added 24 h prior to sampling. The indicated protein levels were analyzed by western blotting. **d** Representative result of four independent reproducible time-chase assay. The indicated proteins expression level in Control and ATR-1 cells treated with 0.1  $\mu$ M of 4OHT for 1~3 days were analyzed by western blotting. **e** Dot plot and mean of fork speed in Control and ATR-1 cells treated with 0.1  $\mu$ M of 4OHT for 3 days. High dose of ATRi (1  $\mu$ M) was added 1 h prior to IdU/CldU labeling. Representative result of two independent reproducible experiments are shown. Black lines indicate the mean; n = 200; one-way ANOVA Tukey's test. **f** The indicated proteins expression level in RSTC #2 and #5 treated with 0.1  $\mu$ M of 4OHT for 3 days were analyzed by western blotting. Low dose of ATRi (1 nM), Chk1i (1 nM) and those combination (Comb.) was added 24 h prior to sampling. Representative result of two independent reproducible experiments are shown. **g**, **h** Identification of phosphorylated site of PrimPol with LC-MS/MS. **g** The result of SYPRO Ruby Protein Gel stain for phospho-proteomics sampling. ATR-1 cells harboring doxycycline-inducible myc-PrimPol<sup>WT</sup> were treated with 0.1  $\mu$ M of 4OHT and with or without 1  $\mu$ g/ml of doxycycline for 3 days. Representative result of three independent reproducible experiments are shown. **h** The list of phosphorylated or dephosphorylated site (highlighted in red) of myc-PrimPol revealed by phospho-proteomics analysis. All source data are provided as a Source Data file.

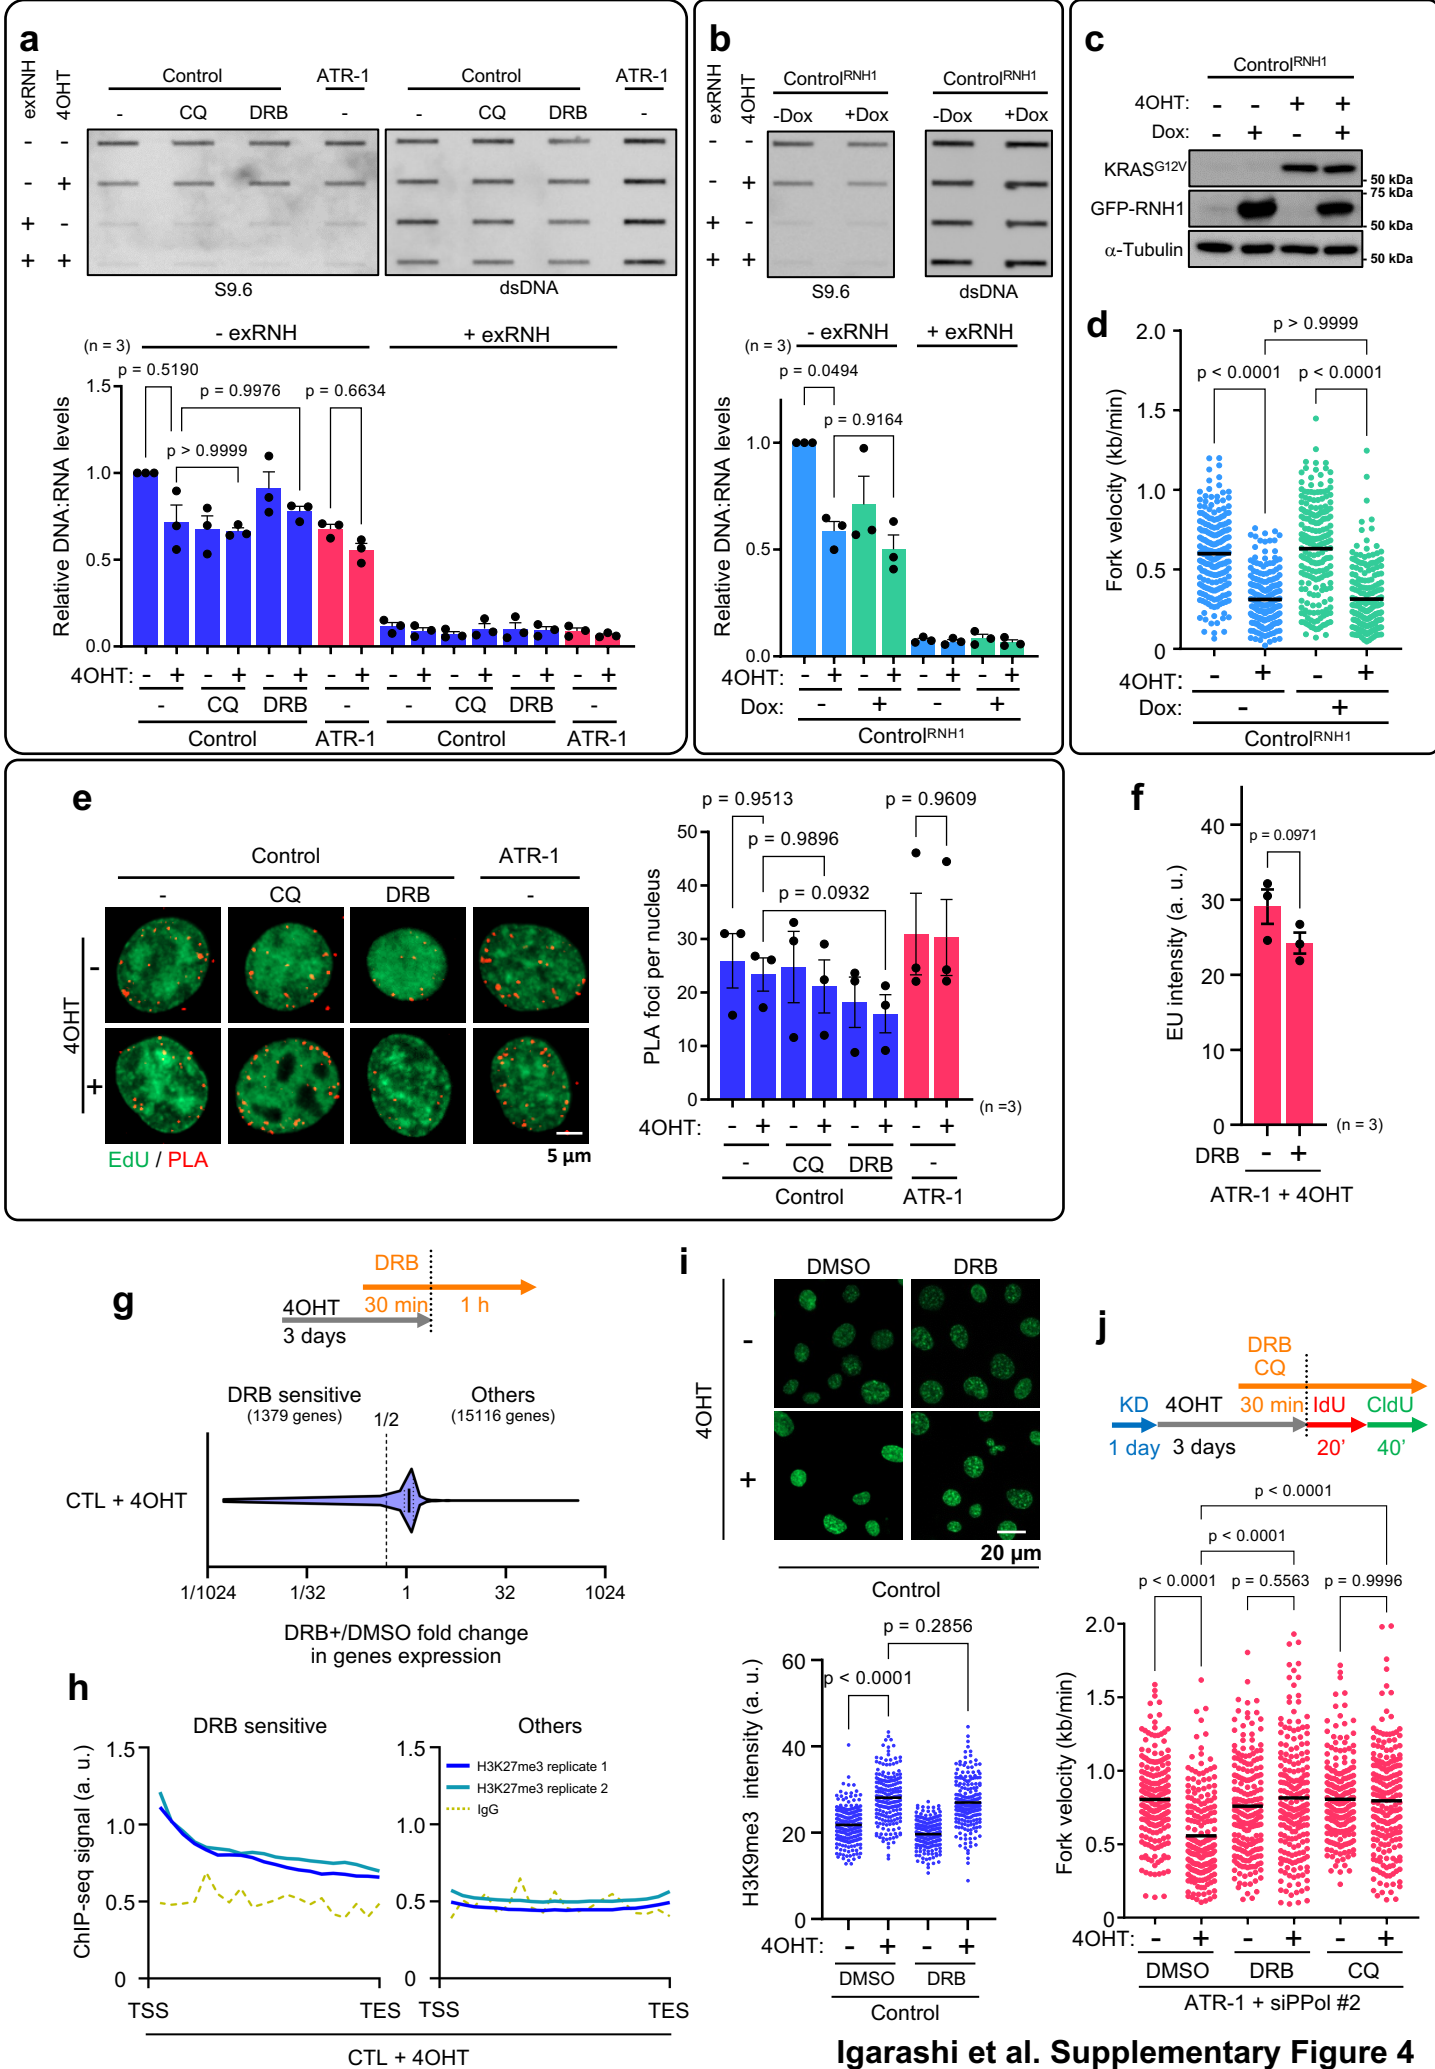

#### Supplementary Figure 4.

**a** Top, representative result of slot blot assay for R-loop. Control and ATR-1 cells were treated with 0.1  $\mu$ M of 4OHT for 3 days. 100  $\mu$ M of DRB or 40  $\mu$ M of Chloroquine (CQ) was added 90 min prior to sampling. Bottom, quantification of the S9.6 signal normalized by parallel dsDNA signal. The results represent the means  $\pm$  SEM of three independent experiments. one-way ANOVA Tukey's test. **b** Top, representative result of slot blot assay for R-loop. Control cells harboring doxycycline-inducible GFP-RNaseH1 were treated with 0.1  $\mu$ M of 4OHT and with or without 1  $\mu$ g/ml of doxycycline for 3 days. Bottom, quantification of the S9.6 signal normalized by parallel dsDNA signal. The results represent the means  $\pm$  SEM of three independent experiments. one-way ANOVA Tukey's test. **c, d** Control cells harboring doxycycline-inducible GFP-RNaseH1 were treated with 0.1  $\mu$ M of 4OHT with or without 1  $\mu$ g/ml of doxycycline for 3 days. **c** The indicated proteins expression level were analyzed by western blotting. **d** Dot plot and mean of fork speed. Representative result of two independent reproducible experiments are shown. **e** Left, representative proximity ligation assay (PLA) foci image showing transcription-replication collision (TRC) in Control and ATR-1 cells treated with 0.1  $\mu$ M of 4OHT for 3 days. 100  $\mu$ M of DRB or 40  $\mu$ M of CQ was added 90 min prior to fixation. Cells were treated with 10  $\mu$ M of EdU for final 30 min to detect S-phase, then PLA was performed using antibody against PCNA and phospho-POLII (Ser2). Right, number of PLA foci in EdU positive cells. The results represent the means  $\pm$  SEM of three independent experiments. one-way ANOVA Tukey's test. **f** Quantification of EU intensity of ATR-1 cells treated with 0.1  $\mu$ M of 4OHT for 3 days. 1 mM of EU was added 23 h prior to 100  $\mu$ M of DRB treatment for final 60 min. The results represent the means  $\pm$  SEM of three independent experiments. two-tailed paired parametric t test. **g** Quantification of fold change (FC) in gene expression with DRB treatment analyzed by RNA-seq. Control cells were treated with 0.1  $\mu$ M of 4OHT for 3 days and 100  $\mu$ M of DRB treatment for totally 90 min (see **4a**). FC<1/2 genes were determined as DRB sensitive. **h** The distribution of H3K27me3 ChIP-seq signals within gene loci were visualized by the scale-regions function of deepTools. H3K27me3 ChIP-seq data of SAEC were provided from Suzuki, A. et al. (PMID: 25378332). arbitrary units, a. u. **i** Top, representative image of chromatin-bound H3K9me3 staining. After 0.1  $\mu$ M of 4OHT treatment for 3 days, control cells were treated with 100  $\mu$ M of DRB for 90 min, followed by staining with anti-H3K9me3 antibody with pre-extraction method. Scale bar=20  $\mu$ m. Bottom, quantification of the H3K9me3 intensity. Representative result of two independent reproducible experiments are shown. arbitrary units, a. u. **j** Dot plot and mean of fork speed in ATR-1 cells transfected with 1 nM of siPPol #2 for 24 h and treated with 0.1  $\mu$ M of 4OHT for 3 days. 100  $\mu$ M of DRB or 40  $\mu$ M of CQ was added 30 min prior to IdU/CldU labeling. Representative result of four independent reproducible experiments are shown. **d, i, j** Black lines indicate the mean; n = 200; one-way ANOVA Tukey's test. All source data are provided as a Source Data file.



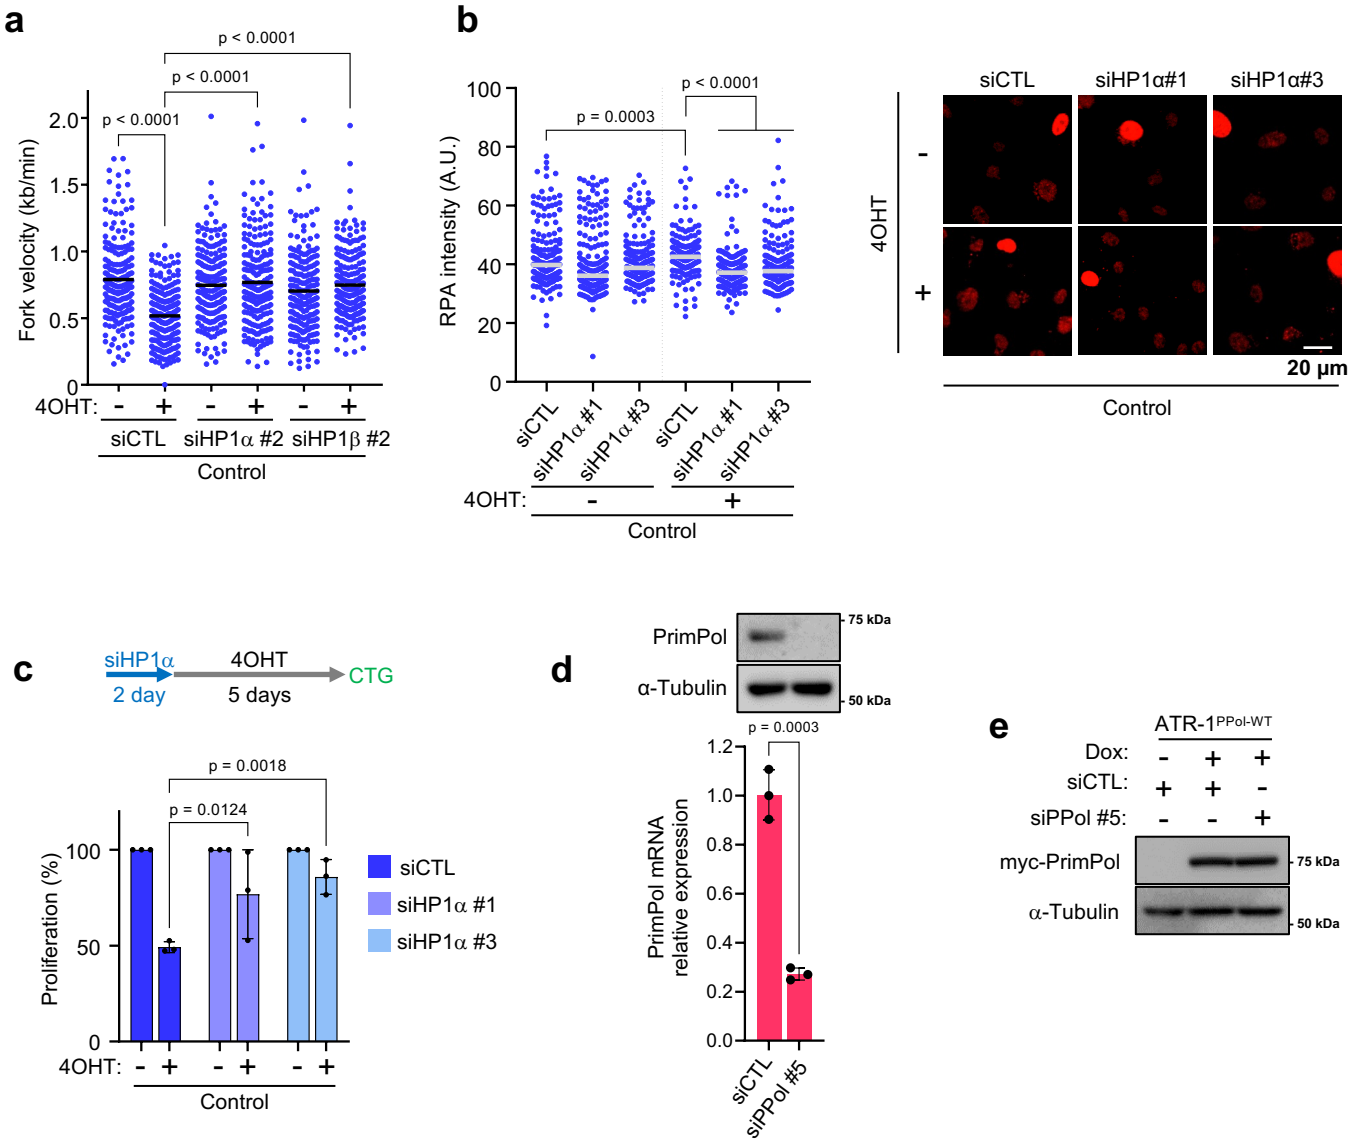

### Supplementary Figure 5.

**a** Dot plot and mean of fork speed in Control cells transfected with 1 nM of siControl, siHP1 $\alpha$  #2 or siHP1 $\beta$  #2 for 24 h and treated with 0.1  $\mu$ M of 4OHT for 3 days. Representative result of two independent reproducible experiments are shown. **b** Left, Quantification of the RPA32 intensity. Control cells were transfected with 1 nM of siControl, siHP1 $\alpha$  #1 or siHP1 $\alpha$  #3 for 24 h, then treated with 0.1  $\mu$ M of 4OHT for 3 days. Representative result of two independent reproducible experiments are shown. Gray lines indicate the median;  $n = 200$ ; two-tailed Mann-Whitney t test. Right, Representative image of RPA immunofluorescence. Scale bar=20  $\mu$ m. **c** Quantification of cell proliferation of the cells. Cells were transfected with 1 nM of siControl or siHP1 $\alpha$  #1,3 for 48 h and incubated with 0.1  $\mu$ M of 4OHT for 5 days. Cell growth was determined using Cell Titer-Glo 2.0 Assay. The results represent the means  $\pm$  SEM of three independent experiments. two-way ANOVA Šidák's multiple comparisons test. **d** ATR-1 cells were transfected with 1 nM of siControl and siUTR-PrimPol (siPPol #5) for 24 h. The expression level of PrimPol were analyzed by RT-qPCR and Western Blotting. Data are presented as mean  $\pm$  SD ( $n=3$ ). two-tailed unpaired t test. **e** ATR-1 cells harboring doxycycline-inducible myc-PrimPol<sup>WT</sup> were transfected with 1 nM of siControl or siPPol #5 for 24 h and treated with 1  $\mu$ g/ml of doxycycline for 24 h. The expression level of myc-tag PrimPol and  $\alpha$ -Tubulin were analyzed by western blotting. **a**, **b** Black lines indicate the mean;  $n = 200$ ; one-way ANOVA Tukey's test. All source data are provided as a Source Data file.

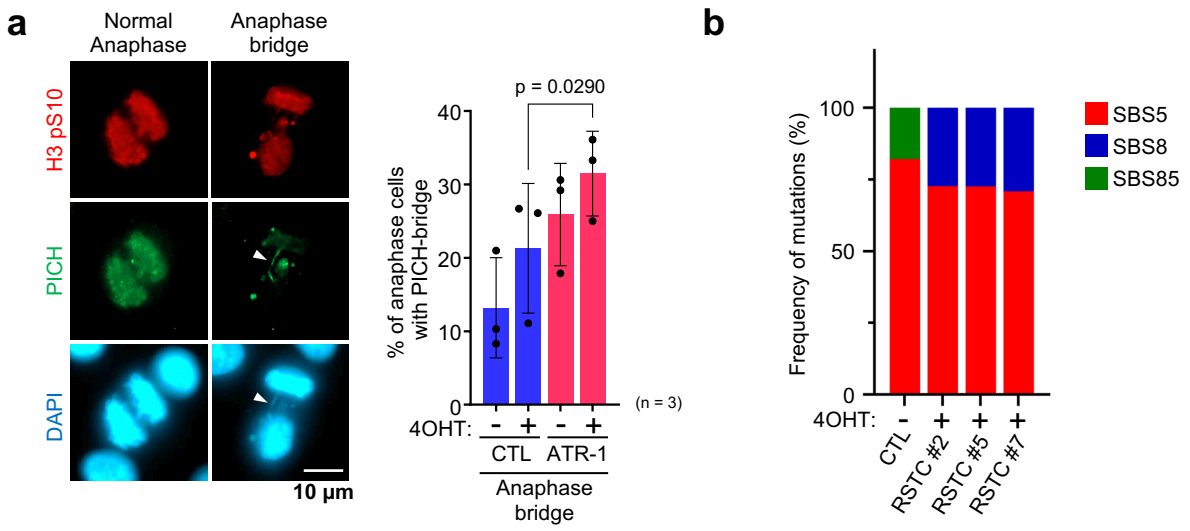

**Supplementary Figure 6.**

**a** Left, representative image of phospho-HistoneH3 (Ser10), PICH and DAPI co-staining. White arrow indicates the anaphase bridge. Right, quantification of the percentage of anaphase bridge-positive cells in M-phase cells. The results represent the means  $\pm$  SEM of three independent experiments. one-way ANOVA Tukey's test. **b** The frequency of mutations in RSTC#2, #5 and #7 assigned to signatures SBS5, SBS8 and SBS85 are shown. All source data are provided as a Source Data file.

**a**

| Cell line | Driver Gene | Driver aberration |
|-----------|-------------|-------------------|
| H1975     | EGFR        | L858R / T790M     |
| H1819     | ERBB        | amp.              |
| H3122     | EML4-ALK    | fusion            |
| A427      | KRAS        | G12D              |
| H358      | KRAS        | G12C              |
| H2009     | KRAS        | G12A              |

**b**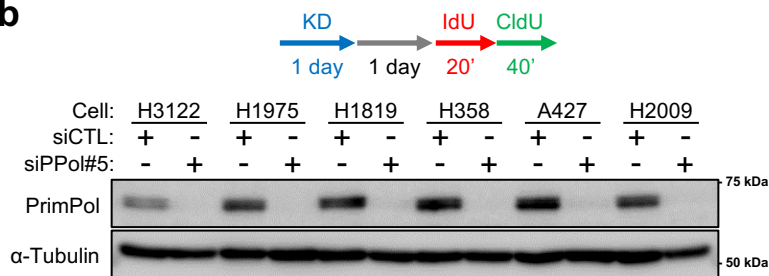**c**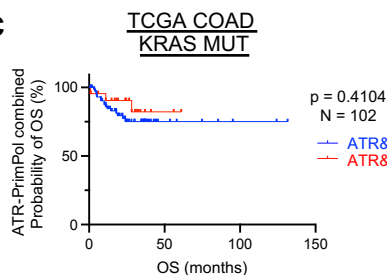**TCGA PAAD**  
**KRAS MUT**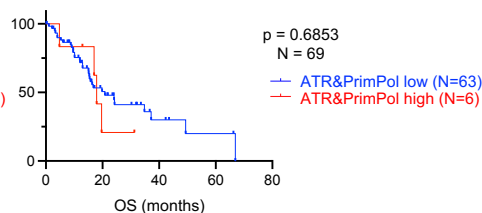**d**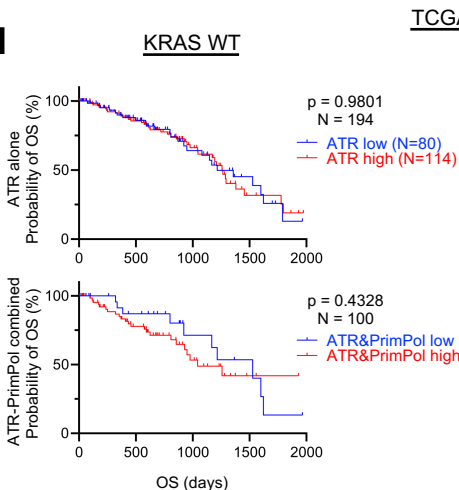**TCGA LUAD**  
**KRAS MUT**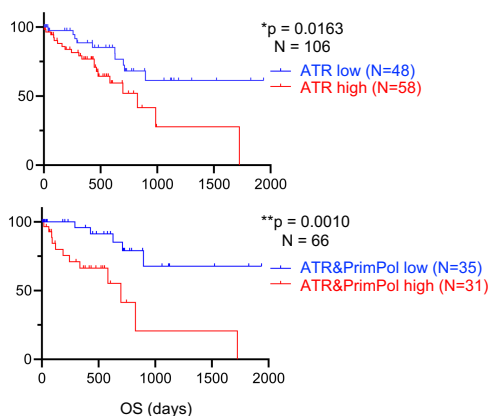**e**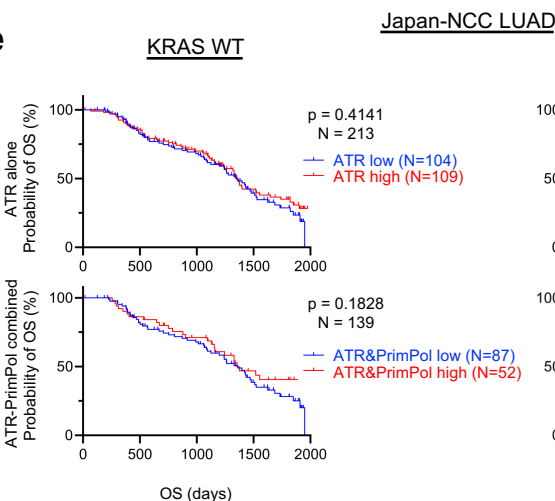**Japan-NCC LUAD**  
**KRAS MUT**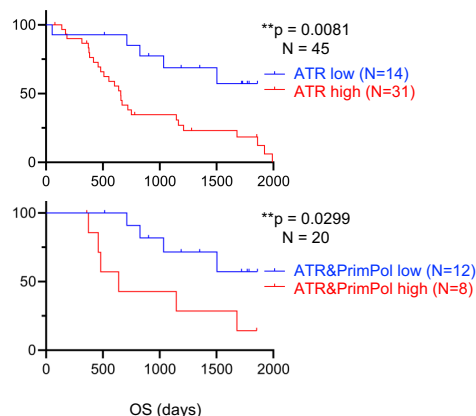**Supplementary Figure 7.**

**a** The character of KRAS<sup>WT</sup> cells (H3122, H1975, H1819) and KRAS<sup>G12mut</sup> cells (H358, A427, H2009). The information was obtained from *Cellosaurus* (PMID: 29805321). **b** Cells were transfected with 1 nM of siControl or siPPol #5 for 24 h and released into siRNA free-medium for 24 h. The expression level of PrimPol and  $\alpha$ -Tubulin were analyzed by western blotting. Representative result of two independent reproducible experiments are shown. **c** OS according to ATR mRNA expression and PrimPol mRNA from COAD and PAAD patients harboring KRAS<sup>Mut</sup> were analyzed. Log-rank p values are shown. **d** TCGA-cohort analysis. OS according to ATR and PrimPol mRNA expression from LUAD patients, who experienced smoking, harboring KRAS<sup>WT</sup> and KRAS<sup>Mut</sup> were analyzed. **e** NCC (Japan) cohort analysis. OS according to ATR and PrimPol mRNA expression from LUAD patients, who experienced smoking, harboring KRAS<sup>WT</sup> and KRAS<sup>Mut</sup> were analyzed. All source data are provided as a Source Data file.
